# Supplementary material
Source: ML conference proceedings conference paper supplement (https://proceedings.neurips.cc/paper_files/paper/2020/hash/96da2f590cd7246bbde0051047b0d6f7-Abstract.html)
Supplement: Supplementary file [file 96da2f590cd7246bbde0051047b0d6f7-Supplemental.zip]

# 1 Appendix

## 2 1.1 Datasets

### 3 1.1.1 GLUE dataset

4 GLUE benchmark introduced by [19] is a collection of nine natural language understanding tasks.  
5 The authors hide the labels of testing set and researchers need to submit their predictions to the  
6 evaluation server<sup>1</sup> to obtain results on testing sets. We only present results of single-task setting for  
7 fair comparison. The GLUE benchmark includes the following datasets.

8 **MNLI** The Multi-Genre Natural Language Inference Corpus [21] is a dataset of sentence pairs  
9 with textual entailment annotations. Given a premise sentence and a hypothesis sentence, the task is  
10 to predict their relationships including ENTAILMENT, CONTRADICTION and NEUTRAL. The data  
11 is from ten distinct genres of written and spoken English.

12 **QNLI** Question Natural Language Inference is a binary sentence pair classification task converted  
13 from The Stanford Question Answering Dataset [17], a question-answering dataset. An example of  
14 QNLI contains a context sentence and a question, and the task is to determine whether the context  
15 sentence contains the answer to the question.

16 **QQP** The Quora Question Pairs dataset [3] is a collection of question pairs from Quora, a com-  
17 munity question-answering website, and the task is to determine whether a pair of questions are  
18 semantically equivalent.

19 **RTE** The Recognizing Textual Entailment (RTE) dataset is similar to MNLI which only has two  
20 classes, i.e., *entailment* and *not entailment*. It is from a series of annual textual entailment challenges  
21 including RTE1 [5], RTE2 [10], RTE3 [8], and RTE5 [1].

22 **SST-2** The Stanford Sentiment Treebank [18] is a dataset that consists of sentences from movie  
23 reviews and human annotations of their sentiment. GLUE uses the two-way (POSITIVE/NEGATIVE)  
24 class split.

25 **MRPC** The Microsoft Research Paraphrase Corpus [7] is a dataset from online news that consists  
26 of sentence pairs with human annotations for whether the sentences in the pair are semantically  
27 equivalent.

28 **CoLA** The Corpus of Linguistic Acceptability [20] is a binary single-sentence classification dataset  
29 containing the examples annotated with whether it is a grammatical English sentence.

30 **SST-B** The Semantic Textual Similarity Benchmark [2] is a collection of sentence pairs human-  
31 annotated with a similarity score from 1 to 5, in which models are required to predict the scores.

32 **WNLI** Winograd NLI [13] is a small natural language inference dataset, but as GLUE web page<sup>2</sup>  
33 noted, there are issues with the construction of it. Thus like previous works, GPT [15] and BERT  
34 [12] etc., we exclude this dataset for fair comparison.

### 35 1.1.2 SQuAD dataset

36 The Stanford Question Answering Dataset (**SQuAD v1.1**), a question answering (reading comprehen-  
37 sion) dataset which consists of more than 100K questions. The answer to each question is a span of  
38 text from the corresponding context passage, meaning that every question can be answered. Then the  
39 following version **SQuAD v2.0** combines the existing data with over 50K unanswerable questions.

---

<sup>1</sup><https://gluebenchmark.com>

<sup>2</sup><https://gluebenchmark.com/faq>

## 40 1.2 Pre-training details

41 We first give a brief introduction to the replaced token detection task we used for pre-training proposed  
 42 by [4]. It trains the model in a discriminative way by predicting whether the token in the sequence is  
 43 replaced. Meanwhile, to generate the sentence with replaced tokens as training example, they propose  
 44 to use a small-sized generator trained with masked language modelling [6]. The full input sequence  
 45 is first masked and then feed to the generator to get the prediction of the masked tokens. The target  
 46 model then serves as a discriminator to distinguish the tokens that are wrongly predicted by the  
 47 generator. The generator and the discriminator are jointly trained with masked language modelling  
 48 loss and replaced token detection loss.

49 For the pre-training configuration, we mostly use the same hyper-parameters as ELECTRA [4]. See  
 50 Table 1 for more details. While using examples of 128 sequence length for pre-training can save a lot  
 51 of computation, we also find that using examples with longer sequence length can help to improve  
 52 the performance on downstream task that has longer context. We pre-train our model with input  
 53 sequence of length 512 for the 10% more updates before fine-tuning it for task with longer context  
 54 like SQuAD. This helps the positional embedding generalize better to the downstream tasks.

Table 1: Pre-training hyper-parameters. Generator size here is the multiplier for hidden size, feed-forward inner hidden size and attention heads to compute configuration for generator. The optimizer used here is an Adam optimizer [11], and details of the optimizer are listed in the table.

| Hyper-parameter                | Small  | Medium-small | Base   |
|--------------------------------|--------|--------------|--------|
| Layer                          | 12     | 12           | 12     |
| Hidden dim                     | 256    | 384          | 768    |
| Word Embedding dim             | 128    | 128          | 768    |
| feed-forward inner hidden size | 1024   | 1536         | 3072   |
| Generator size                 | 1/4    | 1/4          | 1/3    |
| Attention heads                | 2      | 4            | 6      |
| Attention head size            | 64     | 48           | 64     |
| Learning rate                  | 3e-4   | 5e-4         | 2e-4   |
| Learning rate decay            | Linear | Linear       | Linear |
| Warmup steps                   | 10k    | 10k          | 10k    |
| Adam $\epsilon$                | 1e-6   | 1e-6         | 1e-6   |
| Adam $\beta_1$                 | 0.9    | 0.9          | 0.9    |
| Adam $\beta_2$                 | 0.999  | 0.999        | 0.999  |
| Dropout                        | 0.1    | 0.1          | 0.1    |
| Batch size                     | 128    | 128          | 256    |
| Input sequence length          | 128    | 128          | 128    |

## 55 1.3 Fine-tuning details

56 Following previous work [4, 6], we search for learning rate among {5e-5, 1e-4, 2e-4, 3e-4} and  
 57 weight decay among {0.01, 0.1}. For the number of training epoch, we search for the best among  
 58 {10, 3}. All other parameters are kept the same as [4]. See Table 2.

## 59 1.4 More results

60 We present more results on GLUE dev set with different model sizes and pre-training settings in  
 61 Table 3. As can be seen, regardless of the pre-training task and dataset size, our method consistently  
 62 outperform the original BERT [6] architecture.

## 63 1.5 More examples and analysis of attention map

64 We provide more examples of the attention map in Figure 1. we also compute the diagonal concentra-  
 65 tion for the attention map  $M$  as quantitative metric. It is define as  $C = \frac{\sum_{|i-j| \leq 4} M_{i,j}}{\sum_{|i-j| > 4} M_{i,j}}$ . This indicates

Table 2: Fine-tuning hyper-parameters. The optimizer used here is an Adam optimizer [11], and details of the optimizer are listed in the table.

| Hyper-parameter     | Value  |
|---------------------|--------|
| Adam $\epsilon$     | 1e-6   |
| Adam $\beta_1$      | 0.9    |
| Adam $\beta_2$      | 0.999  |
| Layer-wise LR decay | 0.8    |
| Learning rate decay | Linear |
| Warmup fraction     | 0.1    |
| Dropout             | 0.1    |
| Batch size          | 32     |

Table 3: Comparison of our proposed ConvBERT architecture with the transformer based BERT architecture in different sizes and different pre-training settings. GLUE score represents the average score of 8 tasks on GLUE development set. MLM represents masked language modelling and RTD represents replaced token detection. The 16G WikiBooks dataset is the combination of EnWiki and BOOKCORPUS, 32G represents the OpenWebText dataset proposed by [16, 9], and 160G represents the combination of several corpus datasets used by ELECTRA [4] and RoBERTa [14]. \* denotes the results from ELECTRA and + denotes the result from RoBERTa.

| Model              | Pre-train task | Training data | update | Train FLOPs | Params | GLUE  |
|--------------------|----------------|---------------|--------|-------------|--------|-------|
| BERTSMALL          | MLM            | 16G           | 1.45M  | 1.4e18      | 14M    | 75.1* |
|                    | RTD            | 16G           | 1M     | 1.4e18      | 14M    | 79.7* |
|                    | RTD            | 32G           | 1M     | 1.4e18      | 14M    | 80.3* |
|                    | RTD            | 160G          | 4M     | 3.3e19      | 14M    | 81.1* |
| ConvBERTSMALL      | MLM            | 16G           | 1.45M  | 1.3e18      | 14M    | 75.9  |
|                    | RTD            | 16G           | 1M     | 1.3e18      | 14M    | 80.6  |
|                    | RTD            | 32G           | 1M     | 1.3e18      | 14M    | 81.4  |
|                    | RTD            | 32G           | 4M     | 5.2e18      | 14M    | 81.8  |
| ConvBERTSMALL-PLUS | RTD            | 32G           | 1M     | 1.5e18      | 17M    | 82.1  |
|                    | RTD            | 32G           | 4M     | 6.0e18      | 17M    | 82.8  |
| BERTBASE           | MLM            | 16G           | 1M     | 6.4e19      | 110M   | 82.2* |
|                    | MLM            | 160G          | 500k   | 1.0e21      | 125M   | 86.4+ |
|                    | RTD            | 16G           | 766k   | 6.4e19      | 110M   | 85.1* |
|                    | RTD            | 160G          | 4M     | 3.3e20      | 110M   | 87.5* |
| ConvBERTBASE       | RTD            | 32G           | 1M     | 1.4e19      | 106M   | 86.0  |
|                    | RTD            | 32G           | 4M     | 5.6e19      | 106M   | 87.7  |

66 how much local dependency that the attention map captures. The result in Table 4 shows that the  
67 attention in BERT concentrates more on the local dependency.

Table 4: Average concentration on MRPC.

| Model    | C (diagonal-concentration) |
|----------|----------------------------|
| BERT     | 0.941                      |
| ConvBERT | 0.608                      |

## 68 1.6 Inference speed

69 We test our mixed-attention block and self-attention baseline from base-sized model on Intel CPU  
70 (i7-6900K@3.20GHz). The mixed-attention has lower Flops and is much faster than self-attention,  
71 as shown in Table 5. On the other hand, our implementation for mixed-attention on GPU and TPU is

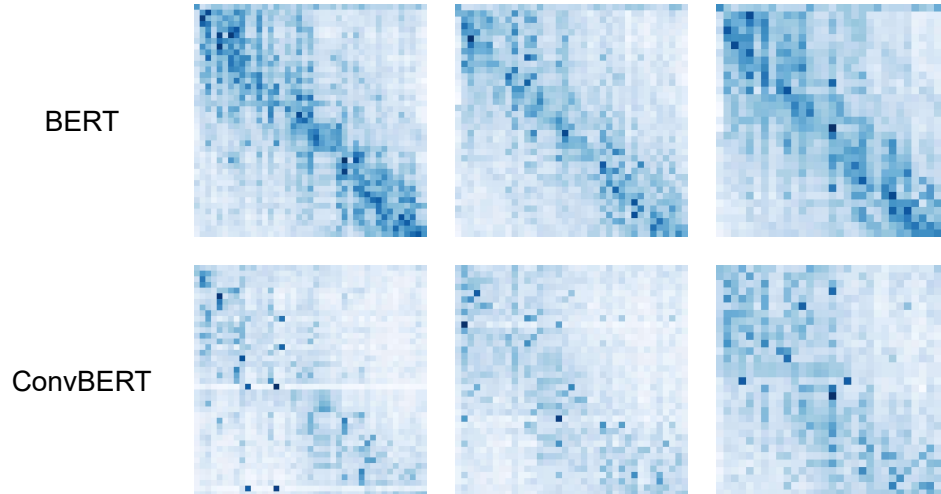

Figure 1: More examples of attention maps.

72 not well optimized for the efficiency yet. Thus its acceleration may not be obvious when the input  
 73 sequence length is short. We will work on further improvement on the low-level implementation.

Table 5: Inference speed.

| Block           | Flops | Speed (ms/sample) |
|-----------------|-------|-------------------|
| self-attention  | 26.5G | 17.66             |
| mixed-attention | 19.3G | <b>12.94</b>      |

## References

- [1] Luisa Bentivogli, Peter Clark, Ido Dagan, and Danilo Giampiccolo. The fifth pascal recognizing textual entailment challenge. In *TAC*, 2009.
- [2] Daniel Cer, Mona Diab, Eneko Agirre, Iñigo Lopez-Gazpio, and Lucia Specia. SemEval-2017 task 1: Semantic textual similarity multilingual and crosslingual focused evaluation. In *Proceedings of the 11th International Workshop on Semantic Evaluation (SemEval-2017)*, pages 1–14, Vancouver, Canada, August 2017. Association for Computational Linguistics.
- [3] Zihan Chen, Hongbo Zhang, Xiaoji Zhang, and Leqi Zhao. Quora question pairs, 2018.
- [4] Kevin Clark, Minh-Thang Luong, Quoc V Le, and Christopher D Manning. Electra: Pre-training text encoders as discriminators rather than generators. In *International Conference on Learning Representations*, 2019.
- [5] Ido Dagan, Oren Glickman, and Bernardo Magnini. The pascal recognising textual entailment challenge. In *Machine Learning Challenges Workshop*, pages 177–190. Springer, 2005.
- [6] Jacob Devlin, Ming-Wei Chang, Kenton Lee, and Kristina Toutanova. Bert: Pre-training of deep bidirectional transformers for language understanding. In *Proceedings of the 2019 Conference of the North American Chapter of the Association for Computational Linguistics: Human Language Technologies, Volume 1 (Long and Short Papers)*, pages 4171–4186, 2019.
- [7] William B. Dolan and Chris Brockett. Automatically constructing a corpus of sentential paraphrases. In *Proceedings of the Third International Workshop on Paraphrasing (IWP2005)*, 2005.
- [8] Danilo Giampiccolo, Bernardo Magnini, Ido Dagan, and Bill Dolan. The third pascal recognizing textual entailment challenge. In *Proceedings of the ACL-PASCAL workshop on textual entailment and paraphrasing*, pages 1–9. Association for Computational Linguistics, 2007.
- [9] Aaron Gokaslan and Vanya Cohen. Openwebtext corpus, 2019.
- [10] R Bar Haim, Ido Dagan, Bill Dolan, Lisa Ferro, Danilo Giampiccolo, Bernardo Magnini, and Idan Szpektor. The second pascal recognising textual entailment challenge. In *Proceedings of the Second PASCAL Challenges Workshop on Recognising Textual Entailment*, 2006.
- [11] Diederik P Kingma and Jimmy Ba. Adam: A method for stochastic optimization. In *ICLR*, 2015.
- [12] Zhenzhong Lan, Mingda Chen, Sebastian Goodman, Kevin Gimpel, Piyush Sharma, and Radu Soricut. ALBERT: A lite bert for self-supervised learning of language representations. *arXiv preprint arXiv:1909.11942*, 2019.
- [13] Hector Levesque, Ernest Davis, and Leora Morgenstern. The winograd schema challenge. In *Thirteenth International Conference on the Principles of Knowledge Representation and Reasoning*, 2012.
- [14] Yinhan Liu, Myle Ott, Naman Goyal, Jingfei Du, Mandar Joshi, Danqi Chen, Omer Levy, Mike Lewis, Luke Zettlemoyer, and Veselin Stoyanov. Roberta: A robustly optimized bert pretraining approach. *arXiv preprint arXiv:1907.11692*, 2019.
- [15] Alec Radford, Karthik Narasimhan, Tim Salimans, and Ilya Sutskever. Improving language understanding by generative pre-training. URL [https://s3-us-west-2.amazonaws.com/openai-assets/researchcovers/languageunsupervised/language\\_understanding\\_paper.pdf](https://s3-us-west-2.amazonaws.com/openai-assets/researchcovers/languageunsupervised/language_understanding_paper.pdf), 2018.
- [16] Alec Radford, Jeffrey Wu, Rewon Child, David Luan, Dario Amodei, and Ilya Sutskever. Language models are unsupervised multitask learners. *OpenAI Blog*, 1(8):9, 2019.
- [17] Pranav Rajpurkar, Jian Zhang, Konstantin Lopyrev, and Percy Liang. SQuAD: 100,000+ questions for machine comprehension of text. In *Proceedings of the 2016 Conference on Empirical Methods in Natural Language Processing*, pages 2383–2392, Austin, Texas, November 2016. Association for Computational Linguistics.
- [18] Richard Socher, Alex Perelygin, Jean Wu, Jason Chuang, Christopher D Manning, Andrew Y Ng, and Christopher Potts. Recursive deep models for semantic compositionality over a sentiment treebank. In *Proceedings of the 2013 conference on empirical methods in natural language processing*, pages 1631–1642, 2013.
- [19] Alex Wang, Amapreet Singh, Julian Michael, Felix Hill, Omer Levy, and Samuel R Bowman. GLUE: A multi-task benchmark and analysis platform for natural language understanding. In *ICLR*, 2019.
- [20] Alex Warstadt, Amanpreet Singh, and Samuel R Bowman. Neural network acceptability judgments. *Transactions of the Association for Computational Linguistics*, 7:625–641, 2019.
- [21] Adina Williams, Nikita Nangia, and Samuel Bowman. A broad-coverage challenge corpus for sentence understanding through inference. In *Proceedings of the 2018 Conference of the North American Chapter of the Association for Computational Linguistics: Human Language Technologies, Volume 1 (Long Papers)*, pages 1112–1122, New Orleans, Louisiana, June 2018. Association for Computational Linguistics.
